# Supplementary material for: Predictors of mortality and morbidity in patients with chronic heart failure
Source: Oxford University Press journal article supplement (doi:10.1093/eurheartj/ehi555), 2005-10-11
Supplement: ehi555_Supplementary_Data.zip [file ehi555_Supplementary_Data.zip]

Figure 1. a) Age

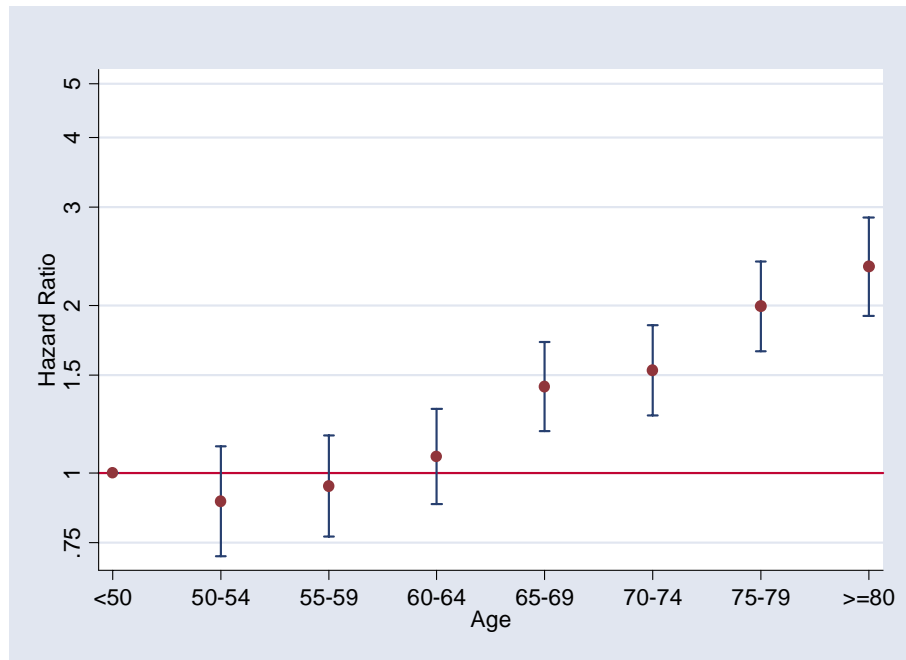

|                |     |       |       |       |       |       |       |     |
|----------------|-----|-------|-------|-------|-------|-------|-------|-----|
| Age            | <50 | 50-54 | 55-59 | 60-64 | 65-69 | 70-74 | 75-79 | ≥80 |
| No of Patients | 658 | 658   | 869   | 1071  | 1324  | 1283  | 1126  | 610 |
| No of Events   | 159 | 143   | 210   | 285   | 452   | 440   | 486   | 285 |

Hazard Ratio of CV Death or HF Hospitalisation by Age

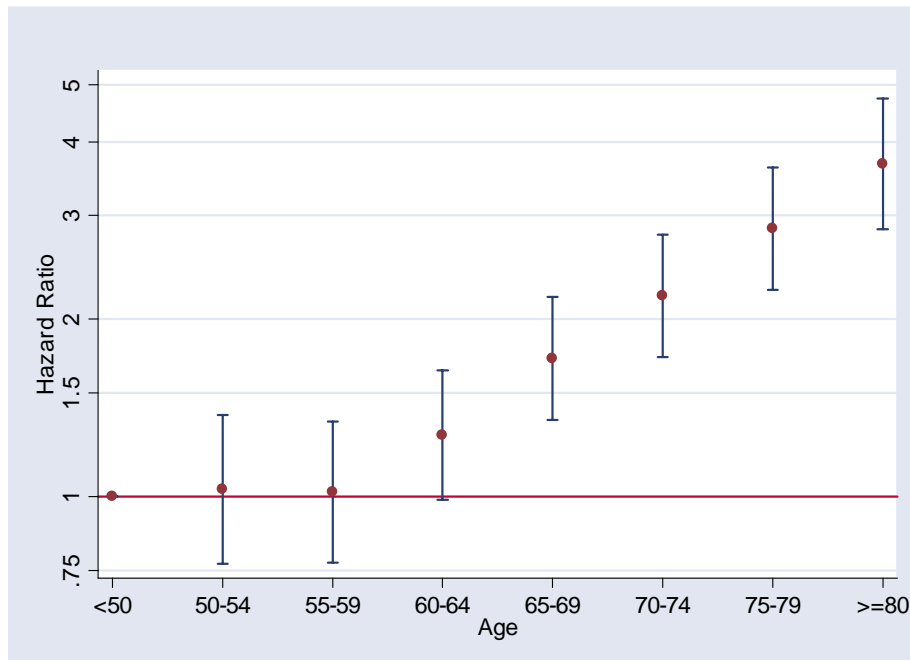

| Age            | <50 | 50-54 | 55-59 | 60-64 | 65-69 | 70-74 | 75-79 | ≥80 |
|----------------|-----|-------|-------|-------|-------|-------|-------|-----|
| No of Patients | 658 | 658   | 869   | 1071  | 1324  | 1283  | 1126  | 610 |
| No of Events   | 89  | 94    | 121   | 195   | 319   | 359   | 398   | 256 |

Hazard Ratio of Death by Age

b) Ejection fraction

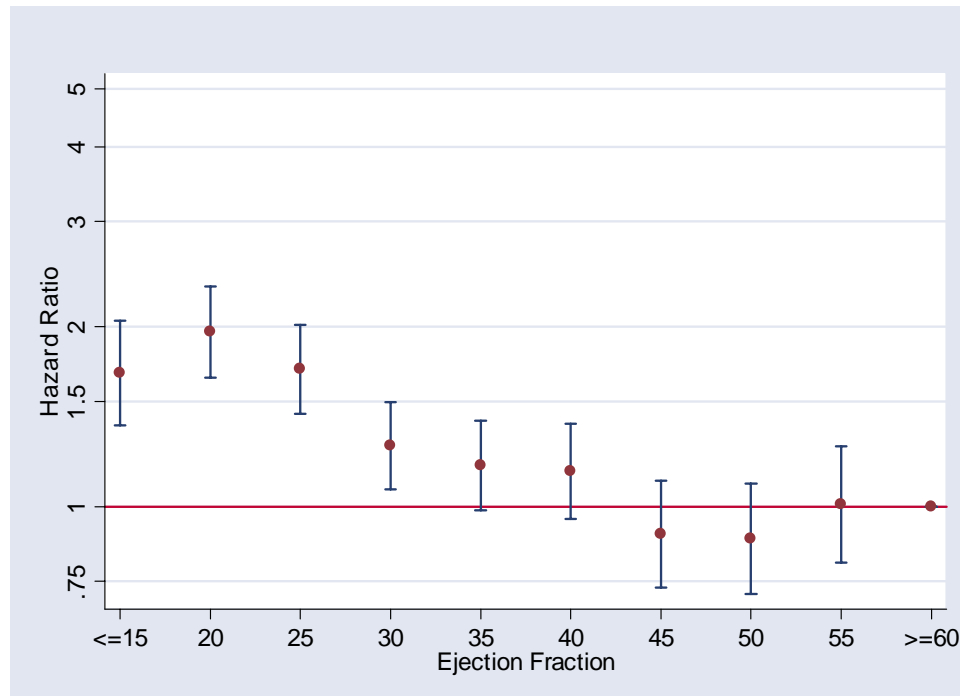

| EF             | <=15 | 20  | 25  | 30   | 35   | 40  | 45  | 50  | 55  | ≥60  |
|----------------|------|-----|-----|------|------|-----|-----|-----|-----|------|
| No of Patients | 374  | 639 | 800 | 1087 | 1055 | 849 | 662 | 633 | 468 | 1032 |
| No of Events   | 191  | 327 | 357 | 392  | 319  | 233 | 148 | 133 | 113 | 247  |

Hazard Ratio of CV Death or HF Hospitalisation by Ejection Fraction

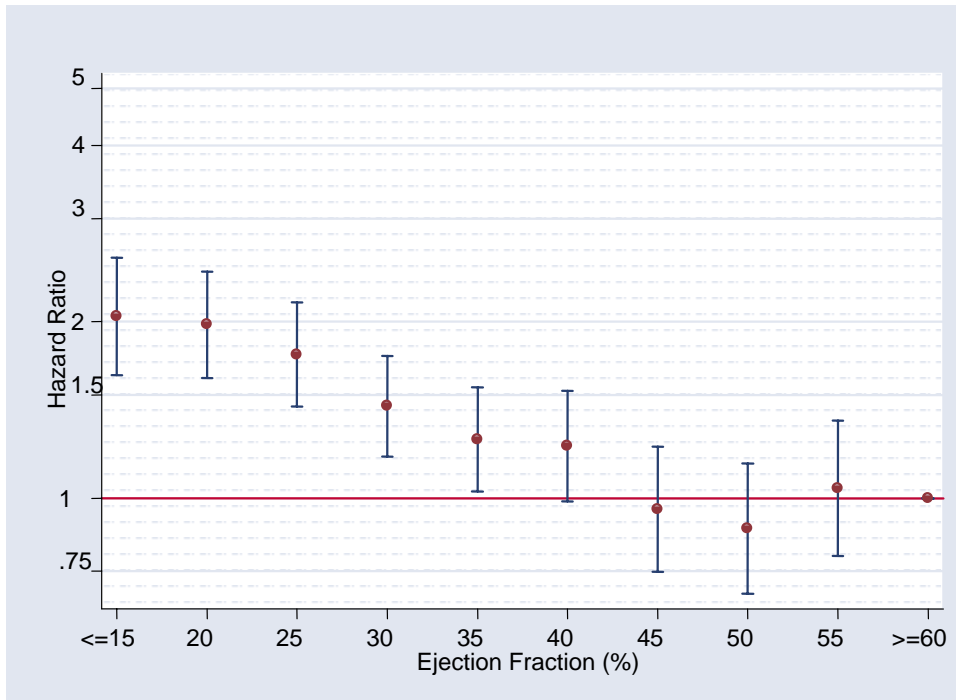

| EF             | <=15 | 20  | 25  | 30   | 35   | 40  | 45  | 50  | 55  | ≥60  |
|----------------|------|-----|-----|------|------|-----|-----|-----|-----|------|
| No of Patients | 374  | 639 | 800 | 1087 | 1055 | 849 | 662 | 633 | 468 | 1032 |
| No of Events   | 160  | 245 | 262 | 311  | 235  | 171 | 106 | 91  | 80  | 170  |

Hazard Ratio of Death by Ejection Fraction
