# Supplementary material for: Predictors of mortality and morbidity in patients with chronic heart failure
Source: Oxford University Press journal article supplement (doi:10.1093/eurheartj/ehi555), 2005-10-11

Figure 2. a) Expected Probability of CV Death or HF Hospitalisation at Year 2 by Risk Score, and also the Distribution of the Risk Score

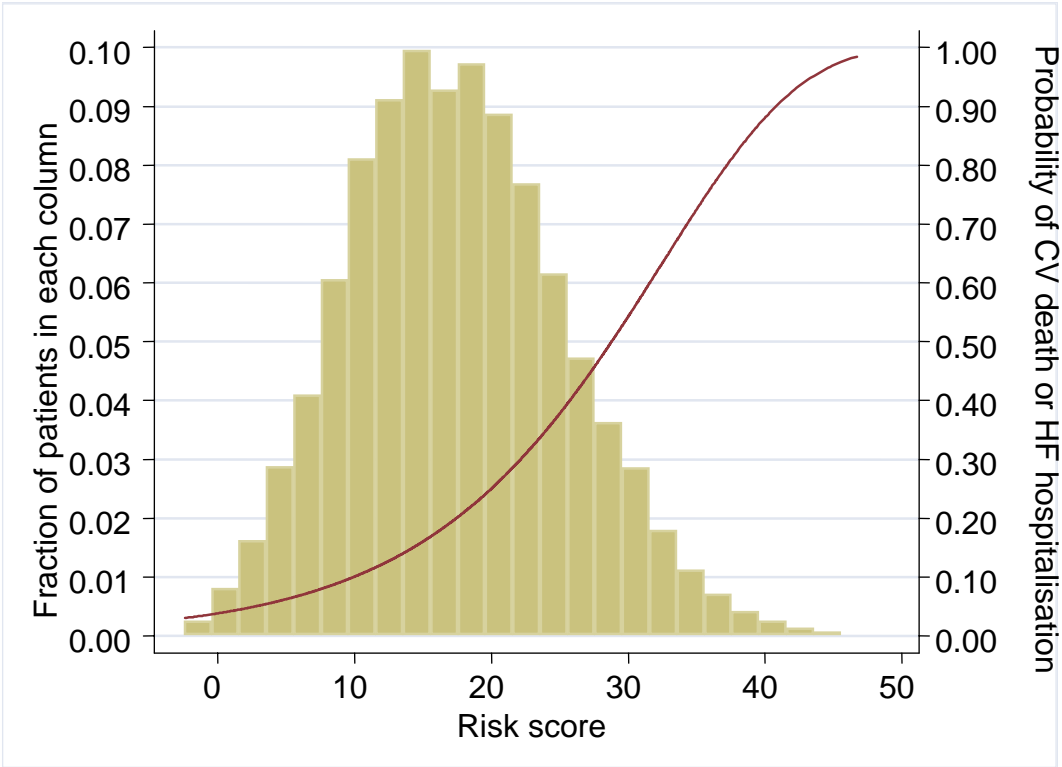

b), Expected Probability of Death at Year 2 by Risk Score, and also the Distribution of the Risk Score

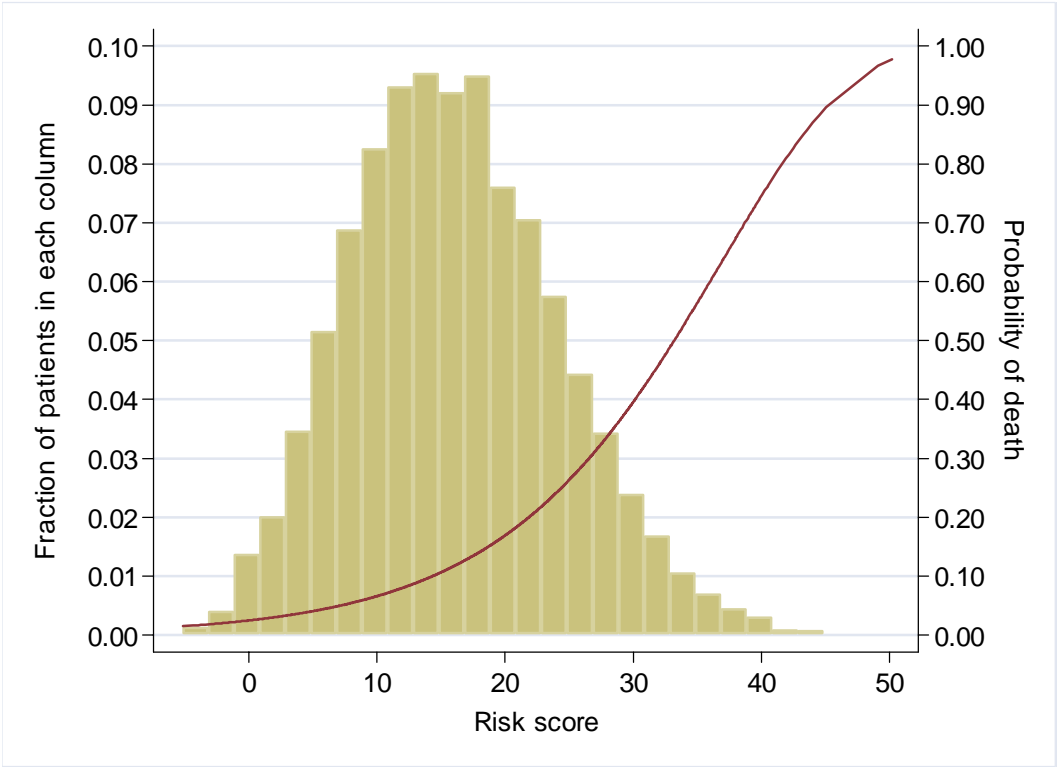

Supplement: ehi555_Supplementary_Data.zip [file ehi555_Supplementary_Data.zip]
