# Supplementary figures and images for: Predictors of mortality and morbidity in patients with chronic heart failure
Source: Oxford University Press journal article supplement (doi:10.1093/eurheartj/ehi555), 2005-10-11

Figure 3.

a) CV death or HF hospitalisation

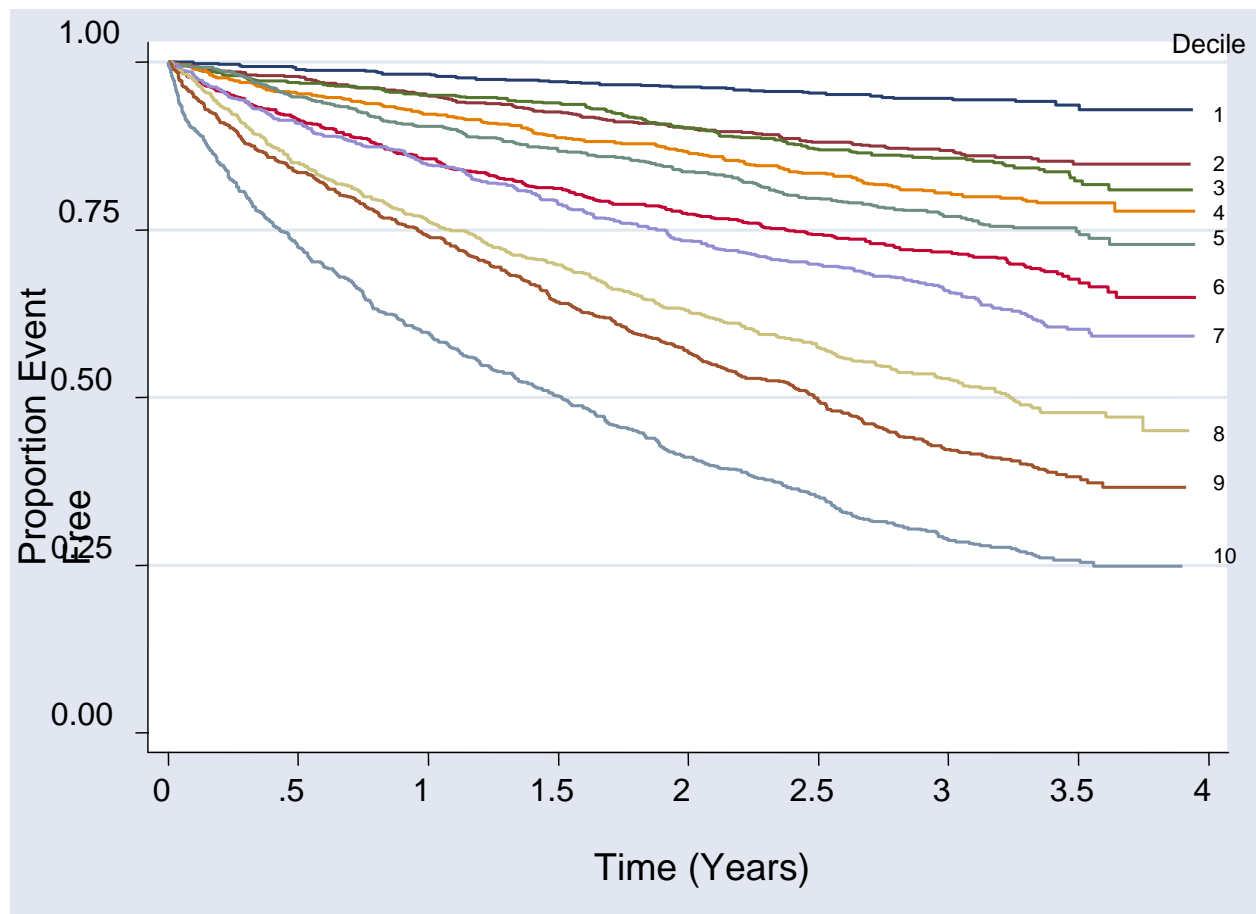

b) All-cause death

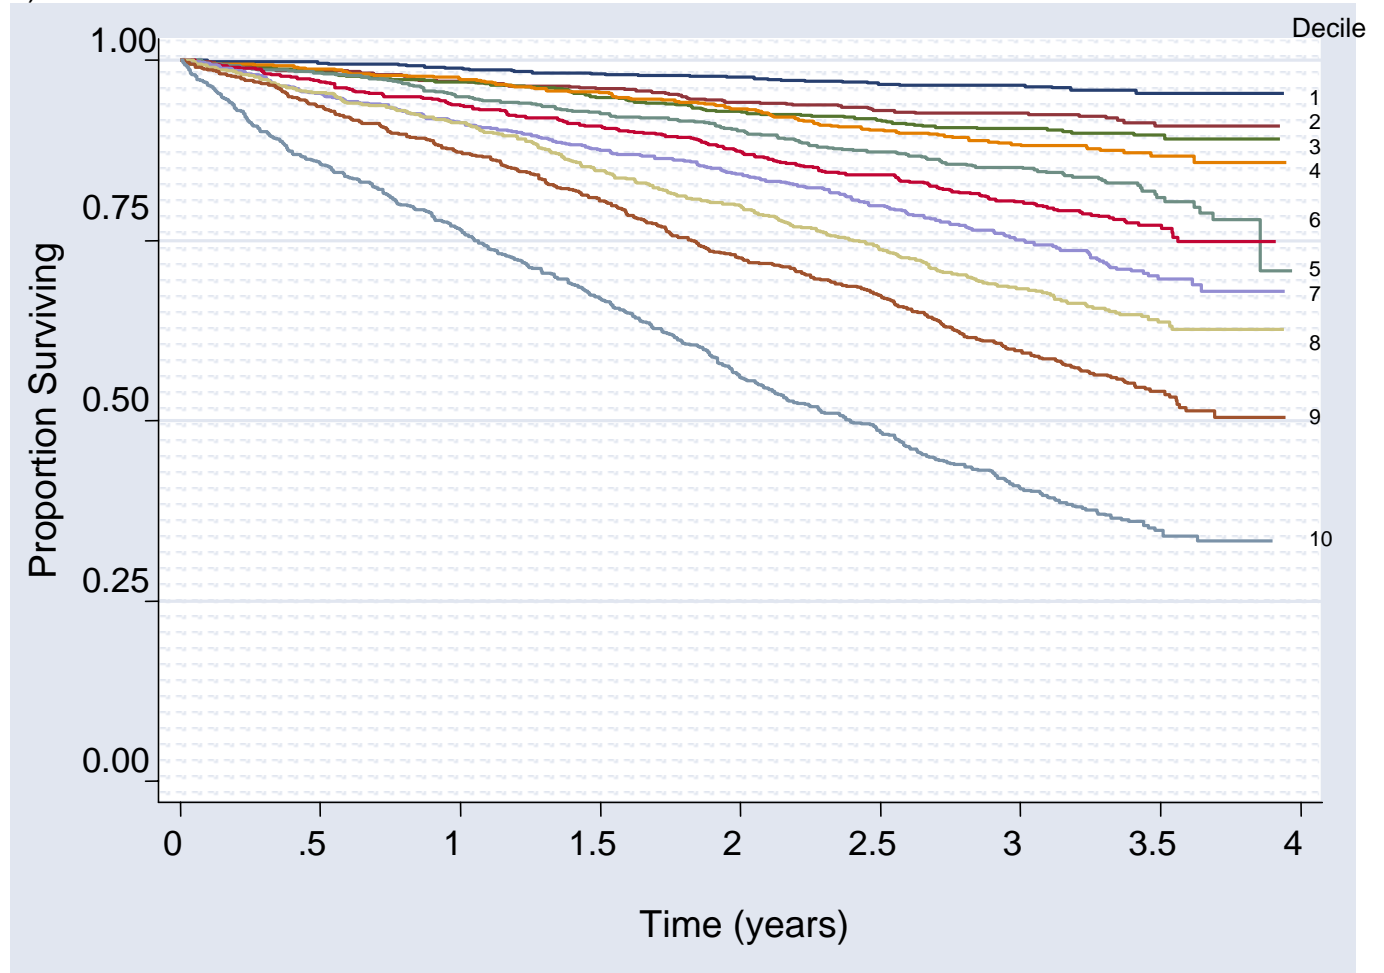

Supplement: ehi555_Supplementary_Data.zip [file ehi555_Supplementary_Data.zip]
